# Supplementary material
Source: PubMed Central journal article supplement (PMC6233840)
Supplement: jamaophthalmol-136-1115-s001.pdf [file jamaophthalmol-136-1115-s001.pdf]

## Supplementary Online Content

Szalai E, Jiang Y, van Poppel NM, et al. Association of uveal melanoma metastatic rate with stochastic mutation rate and type of mutation. *JAMA Ophthalmol*. Published online August 2, 2018. doi:10.1001/jamaophthalmol.2018.2986

**eFigure.** Excessive Numbers of Cell Divisions During the Expansion Phase of Uveal Melanoma

This supplementary material has been provided by the authors to give readers additional information about their work.

**eFigure.**

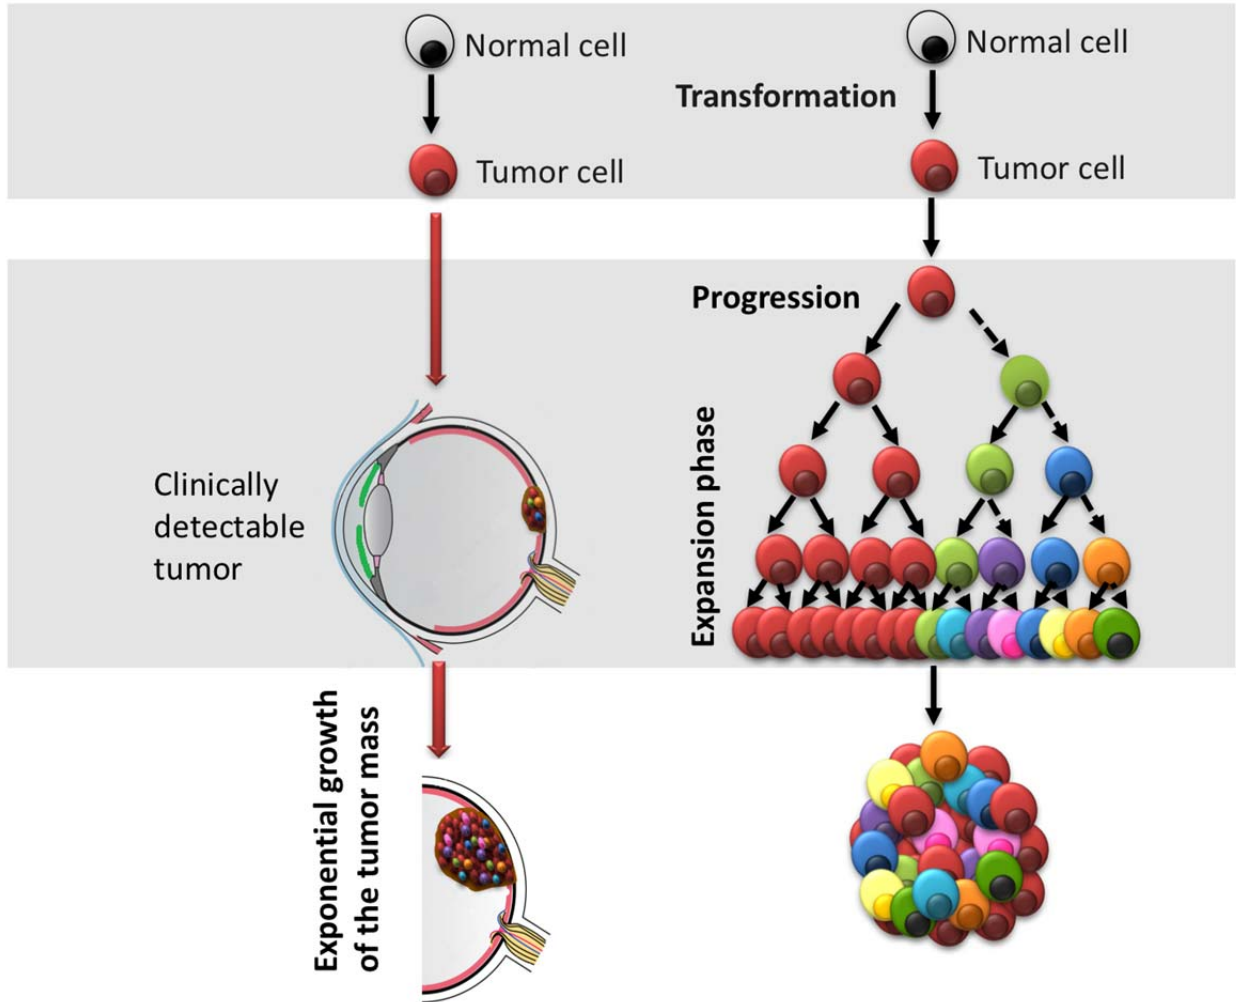

**eFigure 1.** Schematic drawing illustrates the excessive numbers of cell divisions during the expansion phase of uveal melanoma. New mutated clones (dashed arrows) of transformed tumor cells are generated resulting in tumor heterogeneity. The tumor cell doublings and thus the mutation rates are much higher during the expansion phase when the tumor starts growing and becomes clinically detectable.
